# Supplementary material for: Theoretical estimation to double the performance of perovskite solar cells using a graded absorber layer
Source: Royal Society of Chemistry journal article supplement (doi:10.1039/d4se01271b), 2025-01-01
Supplement: d4se01271b1.pdf [file d4se01271b1.pdf]

## Theoretical Estimation to Double the Performance of Perovskite Solar Cell using Graded Absorber Layer

Monisha Nayak,<sup>1</sup> Abu Jahid Akhtar<sup>1</sup> & Sudip K. Saha<sup>1\*</sup>

<sup>1</sup>Department of Physics, Diamond Harbour Women's University, Sarisha, Diamond Harbour Road, South 24 Parganas, West Bengal,

743368, India

[sudipsahaju@gmail.com](mailto:sudipsahaju@gmail.com)

**Table S1: Simulation results for partially graded ( $y=0.2$  to  $0.6$ ) absorber PSC with different individual absorber thickness**

| Sl. No. | Individual layer thickness for a graded structure    |                                                      |                                                      |                                                      |                                                      | Device parameters |                 |              |              |
|---------|------------------------------------------------------|------------------------------------------------------|------------------------------------------------------|------------------------------------------------------|------------------------------------------------------|-------------------|-----------------|--------------|--------------|
|         | FAPb <sub>0.4</sub> Sn <sub>0.6</sub> I <sub>3</sub> | FAPb <sub>0.5</sub> Sn <sub>0.5</sub> I <sub>3</sub> | FAPb <sub>0.6</sub> Sn <sub>0.4</sub> I <sub>3</sub> | FAPb <sub>0.7</sub> Sn <sub>0.3</sub> I <sub>3</sub> | FAPb <sub>0.8</sub> Sn <sub>0.2</sub> I <sub>3</sub> | J <sub>SC</sub>   | V <sub>OC</sub> | FF           | $\eta$       |
| 1.      | 68                                                   | 68                                                   | 68                                                   | 68                                                   | 68                                                   | 32.80             | ~0.907          | 57.03        | 16.97        |
| 2.      | 100                                                  | 100                                                  | 70                                                   | 40                                                   | 30                                                   | 33.35             | 0.91            | 57.66        | 17.61        |
| 3.      | 100                                                  | 100                                                  | 40                                                   | 50                                                   | 50                                                   | 33.56             | 0.91            | 57.83        | 17.69        |
| 4.      | <b>100</b>                                           | <b>100</b>                                           | <b>50</b>                                            | <b>50</b>                                            | <b>40</b>                                            | <b>33.50</b>      | <b>0.91</b>     | <b>58.01</b> | <b>17.77</b> |
| 5.      | 100                                                  | 100                                                  | 60                                                   | 40                                                   | 40                                                   | 34.06             | 0.92            | 57.29        | 17.67        |
| 6.      | 100                                                  | 100                                                  | 65                                                   | 45                                                   | 30                                                   | 33.40             | 0.92            | 57.85        | 17.70        |
| 7.      | 100                                                  | 100                                                  | 100                                                  | 20                                                   | 20                                                   | 33.09             | 0.91            | 55.28        | 16.66        |
| 8.      | 100                                                  | 100                                                  | 30                                                   | 60                                                   | 50                                                   | 33.65             | 0.91            | 57.86        | 17.71        |
| 9.      | 120                                                  | 100                                                  | 50                                                   | 50                                                   | 20                                                   | 33.72             | 0.91            | 57.15        | 17.63        |
| 10.     | 120                                                  | 100                                                  | 50                                                   | 40                                                   | 30                                                   | 33.68             | 0.91            | 57.19        | 17.61        |
| 11.     | 120                                                  | 100                                                  | 30                                                   | 40                                                   | 50                                                   | 33.79             | 0.91            | 57.30        | 17.62        |
| 12.     | 120                                                  | 80                                                   | 70                                                   | 40                                                   | 30                                                   | 33.39             | 0.91            | 57.67        | 17.63        |
| 13.     | 150                                                  | 100                                                  | 40                                                   | 30                                                   | 20                                                   | 34.01             | 0.91            | 55.35        | 17.09        |
| 14.     | 150                                                  | 100                                                  | 50                                                   | 30                                                   | 10                                                   | 33.96             | 0.90            | 55.02        | 16.90        |
| 15.     | 200                                                  | 100                                                  | 20                                                   | 10                                                   | 10                                                   | 34.52             | 0.90            | 56.51        | 17.63        |
| 16.     | 230                                                  | 70                                                   | 20                                                   | 10                                                   | 10                                                   | 34.53             | 0.90            | 56.57        | 17.66        |
| 17.     | 230                                                  | 50                                                   | 40                                                   | 10                                                   | 10                                                   | 34.27             | 0.90            | 56.17        | 17.69        |
| 18.     | 50                                                   | 50                                                   | 40                                                   | 100                                                  | 100                                                  | 32.73             | 0.91            | 56.43        | 16.82        |

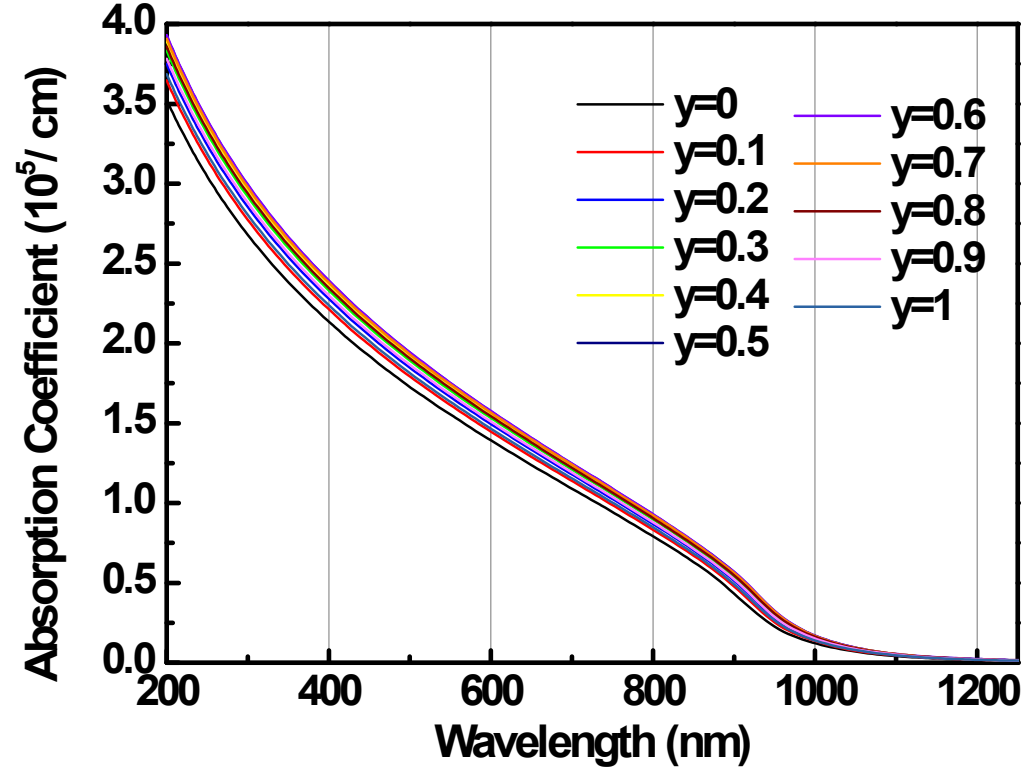

Fig S1: Absorption plot for the graded perovskite absorber  $FAPb_{1-y}Sn_yI_3$  with all the compositions  $y= 0$  to  $1$

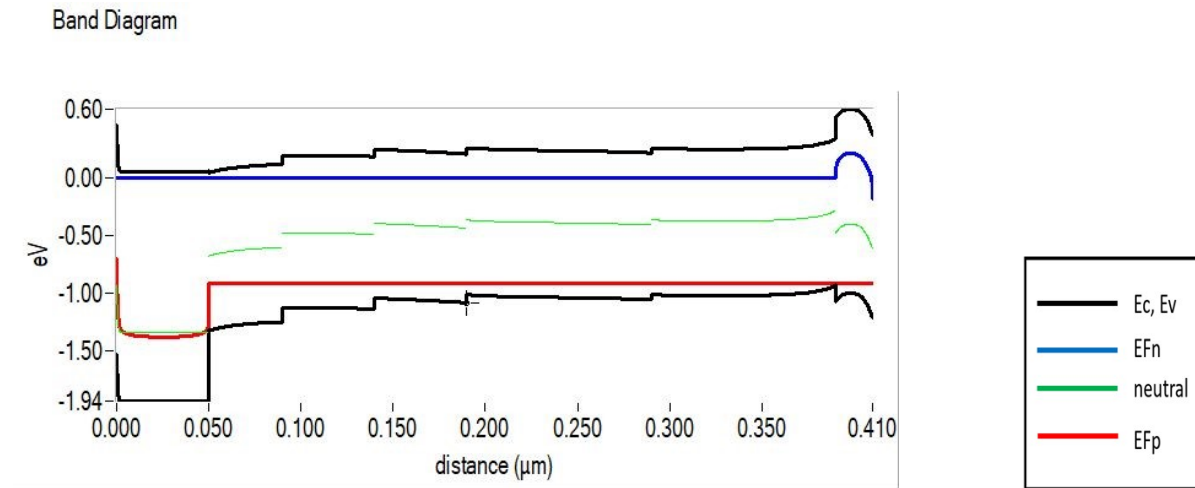

**Fig S2:** Energy band diagram for partially graded PSC with  $y= 0.2$  to  $0.6$  with optimized individual layer thickness

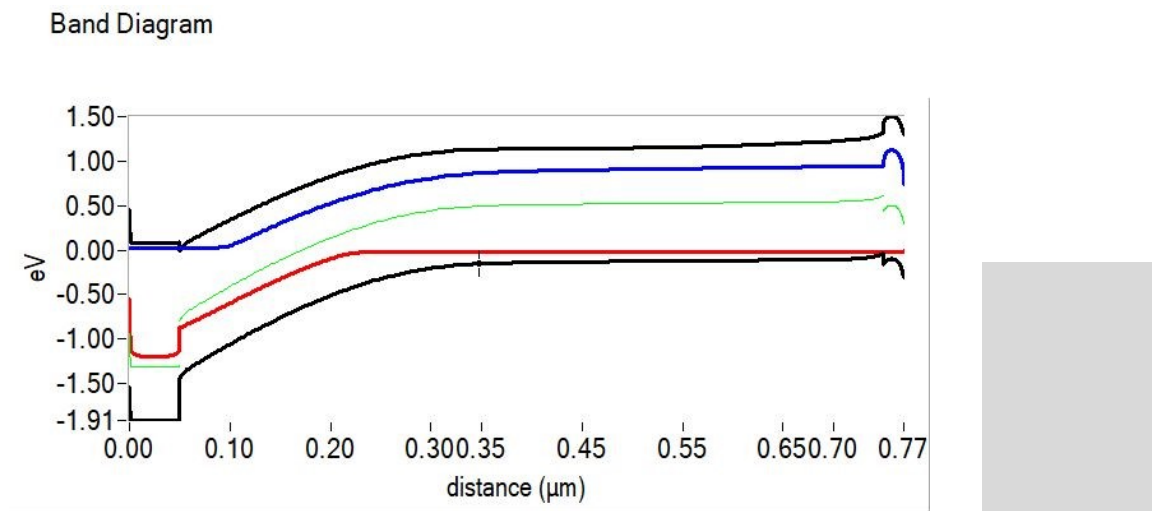

**Fig S3:** *Energy band diagram for partially graded PSC with  $y= 0.2$  to  $0.6$  with optimized individual layer thickness*

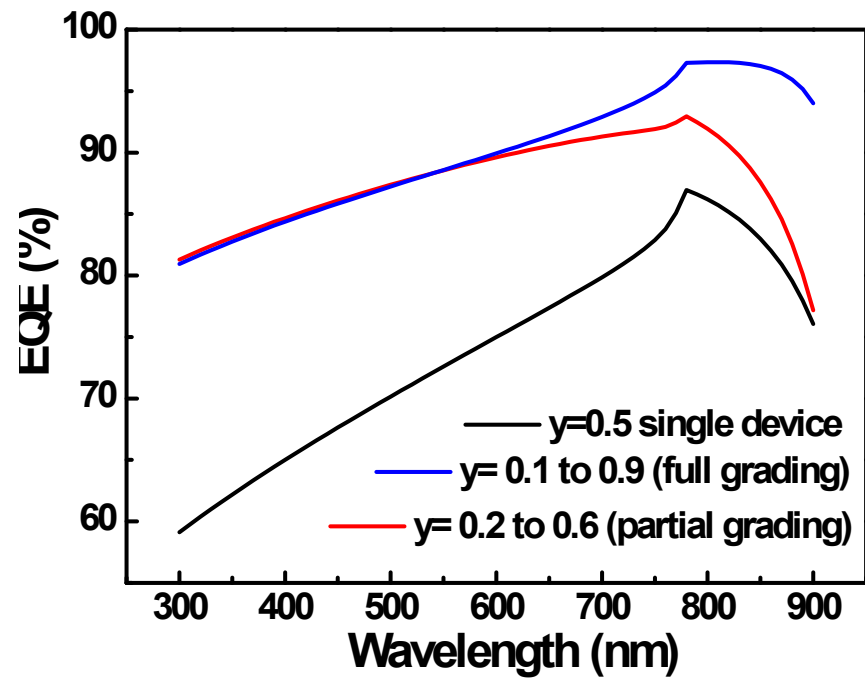

Fig S4: *EQE plot for single layer, partially-graded and full graded device*

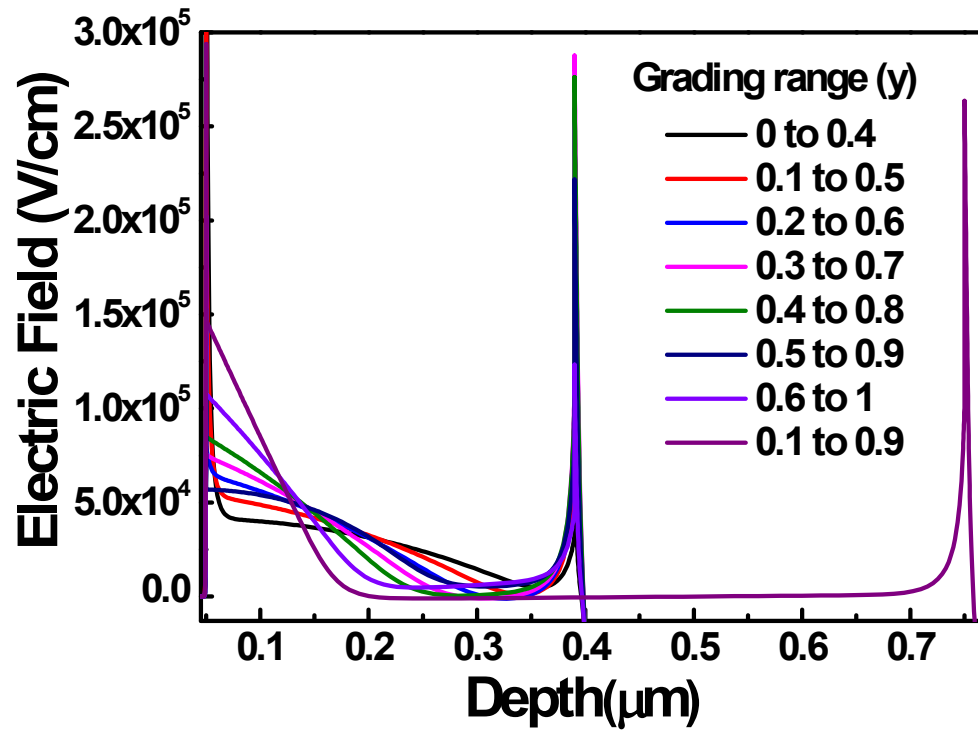

Fig S5: *Internal electric field for partially-graded and full graded devices*
